# Supplementary material for: Global trends and gaps in research related to latent tuberculosis infection
Source: Springer Nature journal article supplement (doi:10.1186/s12889-020-8419-0), 2020-03-18
Supplement: MOESM1 [file 17812074]

## Additional file 1

There are 254 subject categories in the Web of Science. Table S1 shows how the subject categories were assigned to each of the three research areas of interest in this study: laboratory sciences (n = 32), clinical research (n = 30), and public health (n = 47).

**Table S1. Assignment of subject categories in the Web of Science™ to three research areas**

| <i>Research area</i>           | <i>Subject category</i>                   |
|--------------------------------|-------------------------------------------|
| <b>(1) Laboratory sciences</b> | Allergy                                   |
|                                | Biochemical Research Methods              |
|                                | Biochemistry & Molecular Biology          |
|                                | Biology                                   |
|                                | Biophysics                                |
|                                | Biotechnology & Applied Microbiology      |
|                                | Cell & Tissue Engineering                 |
|                                | Cell Biology                              |
|                                | Chemistry, Analytical                     |
|                                | Chemistry, Applied                        |
|                                | Chemistry, Inorganic & Nuclear            |
|                                | Chemistry, Medicinal                      |
|                                | Chemistry, Multidisciplinary              |
|                                | Chemistry, Organic                        |
|                                | Chemistry, Physical                       |
|                                | Engineering, Biomedical                   |
|                                | Evolutionary Biology                      |
|                                | Genetics & Heredity                       |
|                                | Hematology                                |
|                                | Immunology                                |
|                                | Mathematical & Computational Biology      |
|                                | Medical Informatics                       |
|                                | Medical Laboratory Technology             |
|                                | Medicine, Research & Experimental         |
|                                | Microbiology                              |
|                                | Microscopy                                |
|                                | Multidisciplinary Sciences                |
|                                | Parasitology                              |
|                                | Pathology                                 |
|                                | Physiology                                |
|                                | Veterinary Sciences                       |
|                                | Virology                                  |
| <b>(2) Clinical research</b>   | Cardiac & Cardiovascular Systems          |
|                                | Clinical Neurology                        |
|                                | Critical Care Medicine                    |
|                                | Dentistry, Oral Surgery & Medicine        |
|                                | Dermatology                               |
|                                | Emergency Medicine                        |
|                                | Endocrinology & Metabolism                |
|                                | Gastroenterology & Hepatology             |
|                                | Geriatrics & Gerontology                  |
|                                | Imaging Science & Photographic Technology |
|                                | Integrative & Complementary Medicine      |
|                                | Medicine, General & Internal              |
|                                | Neurosciences                             |
|                                | Nutrition & Dietetics                     |
|                                | Obstetrics & Gynecology                   |
|                                | Oncology                                  |
|                                | Ophthalmology                             |
|                                | Orthopedics                               |
|                                | Otorhinolaryngology                       |
|                                | Pediatrics                                |
| Peripheral Vascular Disease    |                                           |

|                          |                                                  |
|--------------------------|--------------------------------------------------|
|                          | Pharmacology & Pharmacy                          |
|                          | Primary Health Care                              |
|                          | Radiology, Nuclear Medicine & Medical Imaging    |
|                          | Respiratory System                               |
|                          | Rheumatology                                     |
|                          | Surgery                                          |
|                          | Toxicology                                       |
|                          | Transplantation                                  |
|                          | Urology & Nephrology                             |
| <b>(3) Public health</b> | Anthropology                                     |
|                          | Area Studies                                     |
|                          | Behavioral Sciences                              |
|                          | Communication                                    |
|                          | Computer Science, Artificial Intelligence        |
|                          | Computer Science, Information Systems            |
|                          | Computer Science, Interdisciplinary Applications |
|                          | Cultural Studies                                 |
|                          | Demography                                       |
|                          | Ecology                                          |
|                          | Economics                                        |
|                          | Education & Educational Research                 |
|                          | Education, Scientific Disciplines                |
|                          | Education, Special                               |
|                          | Engineering, Environmental                       |
|                          | Engineering, Geological                          |
|                          | Environmental Sciences                           |
|                          | Environmental Studies                            |
|                          | Ethics                                           |
|                          | Ethnic Studies                                   |
|                          | Family Studies                                   |
|                          | Geography                                        |
|                          | Gerontology                                      |
|                          | Health Care Sciences & Services                  |
|                          | Health Policy & Services                         |
|                          | Infectious Diseases                              |
|                          | Law                                              |
|                          | Mathematics                                      |
|                          | Mathematics, Applied                             |
|                          | Mathematics, Interdisciplinary Applications      |
|                          | Medical Ethics                                   |
|                          | Meteorology & Atmospheric Sciences               |
|                          | Nursing                                          |
|                          | Psychiatry                                       |
|                          | Psychology                                       |
|                          | Psychology, Social                               |
|                          | Public Administration                            |
|                          | Public, Environmental & Occupational Health      |
|                          | Social Issues                                    |
|                          | Social Sciences, Biomedical                      |
|                          | Social Sciences, Interdisciplinary               |
|                          | Social Work                                      |
|                          | Sociology                                        |
|                          | Statistics & Probability                         |
|                          | Substance Abuse                                  |
|                          | Tropical Medicine                                |
|                          | Urban Studies                                    |
