# Supplementary material for: Global trends and gaps in research related to latent tuberculosis infection
Source: Springer Nature journal article supplement (doi:10.1186/s12889-020-8419-0), 2020-03-18
Supplement: MOESM2 [file 17812074]

Additional file 2

Table S2.1. The Bayesian information criterion (BIC) in the joinpoint regression. The model with the smallest BIC was selected for AAPC 1 estimation in each research discipline.

| Country              | Research area        | Number of joinpoint(s) | BIC           | Selected joinpoint(s) |
|----------------------|----------------------|------------------------|---------------|-----------------------|
| (1) All countries    | Three areas combined | 0                      | 3.205         |                       |
|                      |                      | 1                      | 1.210         |                       |
|                      |                      | 2                      | 0.710         |                       |
|                      |                      | <b>3</b>               | <b>0.703</b>  | <b>3</b>              |
|                      |                      | 4                      | 0.820         |                       |
|                      | Laboratory sciences  | 0                      | 1.936         |                       |
|                      |                      | 1                      | 0.307         |                       |
|                      |                      | 2                      | -0.171        |                       |
|                      |                      | <b>3</b>               | <b>-0.178</b> | <b>3</b>              |
|                      |                      | 4                      | 0.042         |                       |
|                      | Clinical research    | 0                      | 3.291         |                       |
|                      |                      | 1                      | 1.044         |                       |
|                      |                      | 2                      | 0.570         |                       |
|                      |                      | 3                      | 0.546         |                       |
|                      |                      | <b>4</b>               | <b>0.535</b>  | <b>4</b>              |
|                      | Public health        | 0                      | 2.964         |                       |
| 1                    |                      | 1.836                  |               |                       |
| <b>2</b>             |                      | <b>0.959</b>           | <b>2</b>      |                       |
| 3                    |                      | 1.011                  |               |                       |
| 4                    |                      | 1.107                  |               |                       |
| (2) Top 13 countries | Three areas combined | 0                      | 2.868         |                       |
|                      |                      | 1                      | 1.288         |                       |
|                      |                      | <b>2</b>               | <b>0.609</b>  | <b>2</b>              |
|                      |                      | 3                      | 0.714         |                       |
|                      |                      | 4                      | 0.874         |                       |
|                      | Laboratory sciences  | 0                      | 1.638         |                       |
|                      |                      | 1                      | 0.422         |                       |
|                      |                      | <b>2</b>               | <b>-0.010</b> | <b>2</b>              |
|                      |                      | 3                      | 0.002         |                       |
|                      |                      | 4                      | 0.233         |                       |
|                      | Clinical research    | 0                      | 2.900         |                       |
|                      |                      | 1                      | 1.064         |                       |
|                      |                      | <b>2</b>               | <b>0.524</b>  | <b>2</b>              |
|                      |                      | 3                      | 0.604         |                       |
|                      |                      | 4                      | 0.602         |                       |
|                      | Public health        | 0                      | 3.069         |                       |
| 1                    |                      | 1.788                  |               |                       |
| <b>2</b>             |                      | <b>1.164</b>           | <b>2</b>      |                       |
| 3                    |                      | 1.255                  |               |                       |
| 4                    |                      | 1.300                  |               |                       |
| (3) United States    | Three areas combined | 0                      | 2.243         |                       |
|                      |                      | 1                      | 0.555         |                       |
|                      |                      | <b>2</b>               | <b>0.513</b>  | <b>2</b>              |
|                      |                      | 3                      | 0.724         |                       |
|                      |                      | 4                      | 0.935         |                       |
|                      | Laboratory sciences  | 0                      | 0.775         |                       |
|                      |                      | 1                      | 0.215         |                       |
|                      |                      | <b>2</b>               | <b>0.201</b>  | <b>2</b>              |
|                      |                      | 3                      | 0.298         |                       |
|                      |                      | 4                      | 0.425         |                       |
|                      | Clinical research    | 0                      | 1.993         |                       |
|                      |                      | 1                      | 0.339         |                       |
|                      |                      | 2                      | 0.274         |                       |
|                      |                      | <b>3</b>               | <b>0.261</b>  | <b>3</b>              |
|                      |                      | 4                      | 0.412         |                       |
|                      | Public health        | 0                      | 2.281         |                       |

|            |                       |                      |              |               |
|------------|-----------------------|----------------------|--------------|---------------|
|            |                       | <b>1</b>             | <b>0.754</b> | <b>1</b>      |
|            |                       | 2                    | 0.963        |               |
|            |                       | 3                    | 1.110        |               |
|            |                       | 4                    | 1.207        |               |
| <b>(4)</b> | <b>United Kingdom</b> | Three areas combined | 0            | 2.079         |
|            |                       |                      | 1            | 0.513         |
|            |                       |                      | 2            | 0.465         |
|            |                       |                      | <b>3</b>     | <b>0.384</b>  |
|            |                       |                      | 4            | 0.435         |
|            |                       | Laboratory sciences  | 0            | 1.374         |
|            |                       |                      | <b>1</b>     | <b>0.580</b>  |
|            |                       |                      | 2            | 0.759         |
|            |                       |                      | 3            | 0.794         |
|            |                       |                      | 4            | 0.993         |
|            |                       | Clinical research    | 0            | 1.594         |
|            |                       |                      | 1            | -0.032        |
|            |                       |                      | <b>2</b>     | <b>-0.249</b> |
|            |                       |                      | 3            | -0.156        |
|            |                       |                      | 4            | 0.032         |
|            |                       | Public health        | 0            | 1.118         |
|            |                       |                      | 1            | 0.806         |
|            |                       |                      | 2            | 0.563         |
|            |                       |                      | 3            | 0.061         |
|            |                       |                      | <b>4</b>     | <b>0.055</b>  |
| <b>(5)</b> | <b>Italy</b>          | Three areas combined | 0            | 1.254         |
|            |                       |                      | <b>1</b>     | <b>0.263</b>  |
|            |                       |                      | 2            | 0.444         |
|            |                       |                      | 3            | 0.565         |
|            |                       |                      | 4            | 0.778         |
|            |                       | Laboratory sciences  | 0            | 0.415         |
|            |                       |                      | <b>1</b>     | <b>-0.649</b> |
|            |                       |                      | 2            | -0.541        |
|            |                       |                      | 3            | -0.423        |
|            |                       |                      | 4            | -0.205        |
|            |                       | Clinical research    | 0            | 1.077         |
|            |                       |                      | <b>1</b>     | <b>0.536</b>  |
|            |                       |                      | 2            | 0.697         |
|            |                       |                      | 3            | 0.719         |
|            |                       |                      | 4            | 0.824         |
|            |                       | Public health        | 0            | 0.790         |
|            |                       |                      | <b>1</b>     | <b>0.304</b>  |
|            |                       |                      | 2            | 0.397         |
|            |                       |                      | 3            | 0.589         |
|            |                       |                      | 4            | 0.550         |
| <b>(6)</b> | <b>Canada</b>         | Three areas combined | 0            | 1.422         |
|            |                       |                      | 1            | 0.836         |
|            |                       |                      | <b>2</b>     | <b>0.644</b>  |
|            |                       |                      | 3            | 0.875         |
|            |                       |                      | 4            | 1.053         |
|            |                       | Laboratory sciences  | 0            | -0.335        |
|            |                       |                      | <b>1</b>     | <b>-1.139</b> |
|            |                       |                      | 2            | -1.029        |
|            |                       |                      | 3            | -0.858        |
|            |                       |                      | 4            | -0.661        |
|            |                       | Clinical research    | 0            | 1.335         |
|            |                       |                      | 1            | 0.642         |
|            |                       |                      | <b>2</b>     | <b>0.525</b>  |
|            |                       |                      | 3            | 0.706         |
|            |                       |                      | 4            | 0.807         |
|            |                       | Public health        | 0            | 0.896         |
|            |                       |                      | 1            | 0.482         |
|            |                       |                      | 2            | 0.501         |
|            |                       |                      | <b>3</b>     | <b>0.317</b>  |

|                         |                      |                     |               |               |          |
|-------------------------|----------------------|---------------------|---------------|---------------|----------|
|                         |                      | 4                   | 0.346         |               |          |
| (7) <i>South Africa</i> | Three areas combined | 0                   | 0.660         |               |          |
|                         |                      | <b>1</b>            | <b>-0.081</b> | <b>1</b>      |          |
|                         |                      | 2                   | 0.103         |               |          |
|                         |                      | 3                   | 0.346         |               |          |
|                         | Laboratory sciences  | 4                   | 0.582         |               |          |
|                         |                      | 0                   | 0.287         |               |          |
|                         |                      | <b>1</b>            | <b>-0.185</b> | <b>1</b>      |          |
|                         |                      | 2                   | -0.003        |               |          |
|                         | Clinical research    | 3                   | 0.080         |               |          |
|                         |                      | 4                   | 0.279         |               |          |
|                         |                      | 0                   | 0.733         |               |          |
|                         |                      | 1                   | -0.342        |               |          |
|                         | Public health        | 2                   | -0.399        |               |          |
|                         |                      | <b>3</b>            | <b>-0.830</b> | <b>3</b>      |          |
|                         |                      | 4                   | -0.751        |               |          |
|                         |                      | 0                   | 0.383         |               |          |
| (8) <i>Spain</i>        | Three areas combined | <b>1</b>            | <b>-0.191</b> | <b>1</b>      |          |
|                         |                      | 2                   | 0.009         |               |          |
|                         |                      | 3                   | 0.179         |               |          |
|                         |                      | 4                   | 0.359         |               |          |
|                         | Three areas combined | 0                   | 1.973         |               |          |
|                         |                      | 1                   | 1.289         |               |          |
|                         |                      | 2                   | 0.977         |               |          |
|                         |                      | 3                   | 0.855         |               |          |
|                         |                      | <b>4</b>            | <b>0.812</b>  | <b>4</b>      |          |
|                         |                      | Laboratory sciences | 0             | 0.575         |          |
|                         |                      |                     | 1             | 0.499         |          |
|                         |                      |                     | 2             | 0.432         |          |
|                         |                      |                     | 3             | 0.419         |          |
|                         |                      | Clinical research   | <b>4</b>      | <b>0.260</b>  | <b>4</b> |
|                         |                      |                     | 0             | 0.651         |          |
|                         |                      |                     | <b>1</b>      | <b>0.620</b>  | <b>1</b> |
| 2                       | 0.693                |                     |               |               |          |
| Public health           | 3                    | 0.672               |               |               |          |
|                         | 4                    | 0.755               |               |               |          |
|                         | 0                    | 0.761               |               |               |          |
|                         | 1                    | 0.296               |               |               |          |
| (9) <i>China</i>        | Three areas combined | 2                   | 0.229         |               |          |
|                         |                      | 3                   | 0.113         |               |          |
|                         |                      | <b>4</b>            | <b>-0.066</b> | <b>4</b>      |          |
|                         |                      | 0                   | 0.335         |               |          |
|                         | Three areas combined | 1                   | -0.718        |               |          |
|                         |                      | 2                   | -0.925        |               |          |
|                         |                      | <b>3</b>            | <b>-0.999</b> | <b>3</b>      |          |
|                         |                      | 4                   | -0.753        |               |          |
|                         |                      | Laboratory sciences | 0             | 0.250         |          |
|                         |                      |                     | <b>1</b>      | <b>-0.136</b> | <b>1</b> |
|                         |                      |                     | 2             | -0.115        |          |
|                         |                      |                     | 3             | 0.030         |          |
|                         |                      | Clinical research   | 4             | 0.257         |          |
|                         |                      |                     | 0             | 0.246         |          |
|                         |                      |                     | <b>1</b>      | <b>0.185</b>  | <b>1</b> |
|                         |                      |                     | 2             | 0.226         |          |
| Public health           | 3                    | 0.344               |               |               |          |
|                         | 4                    | 0.572               |               |               |          |
|                         | 0                    | -0.473              |               |               |          |
|                         | 1                    | -1.236              |               |               |          |
| (10) <i>Germany</i>     | Three areas combined | 2                   | -1.229        |               |          |
|                         |                      | <b>3</b>            | <b>-1.262</b> | <b>3</b>      |          |
|                         |                      | 4                   | -1.007        |               |          |
|                         |                      | 0                   | 2.085         |               |          |
|                         | Three areas combined | <b>1</b>            | <b>0.588</b>  | <b>1</b>      |          |

|                    |                      |          |               |          |
|--------------------|----------------------|----------|---------------|----------|
|                    |                      | 2        | 0.715         |          |
|                    |                      | 3        | 0.729         |          |
|                    |                      | 4        | 0.955         |          |
|                    | Laboratory sciences  | 0        | 1.286         |          |
|                    |                      | 1        | 0.953         |          |
|                    |                      | 2        | 0.959         |          |
|                    |                      | <b>3</b> | <b>0.563</b>  | <b>3</b> |
|                    |                      | 4        | 0.790         |          |
|                    | Clinical research    | 0        | 1.105         |          |
|                    |                      | <b>1</b> | <b>-0.180</b> | <b>1</b> |
|                    |                      | 2        | -0.036        |          |
|                    |                      | 3        | 0.092         |          |
|                    |                      | 4        | 0.333         |          |
|                    | Public health        | 0        | 0.378         |          |
|                    |                      | <b>1</b> | <b>0.071</b>  | <b>1</b> |
|                    |                      | 2        | 0.159         |          |
|                    |                      | 3        | 0.402         |          |
|                    |                      | 4        | 0.554         |          |
| <b>(11) India</b>  | Three areas combined | 0        | 0.069         |          |
|                    |                      | 1        | -0.067        |          |
|                    |                      | 2        | 0.019         |          |
|                    |                      | 3        | -0.174        |          |
|                    |                      | <b>4</b> | <b>-0.394</b> | <b>4</b> |
|                    | Laboratory sciences  | 0        | -0.010        |          |
|                    |                      | 1        | 0.031         |          |
|                    |                      | 2        | 0.175         |          |
|                    |                      | <b>3</b> | <b>-0.099</b> | <b>3</b> |
|                    |                      | 4        | -0.015        |          |
|                    | Clinical research    | 0        | 1.101         |          |
|                    |                      | 1        | 1.145         |          |
|                    |                      | 2        | 1.240         |          |
|                    |                      | 3        | 0.837         |          |
|                    |                      | <b>4</b> | <b>0.741</b>  | <b>4</b> |
|                    | Public health        | 0        | 0.388         |          |
|                    |                      | 1        | -0.423        |          |
|                    |                      | 2        | -0.648        |          |
|                    |                      | <b>3</b> | <b>-0.809</b> | <b>3</b> |
|                    |                      | 4        | -0.600        |          |
| <b>(12) Brazil</b> | Three areas combined | 0        | 1.053         |          |
|                    |                      | <b>1</b> | <b>0.119</b>  | <b>1</b> |
|                    |                      | 2        | 0.217         |          |
|                    |                      | 3        | 0.329         |          |
|                    |                      | 4        | 0.578         |          |
|                    | Laboratory sciences  | 0        | 0.688         |          |
|                    |                      | 1        | 0.301         |          |
|                    |                      | 2        | 0.255         |          |
|                    |                      | <b>3</b> | <b>-0.318</b> | <b>3</b> |
|                    |                      | 4        | -0.110        |          |
|                    | Clinical research    | 0        | 0.516         |          |
|                    |                      | 1        | 0.064         |          |
|                    |                      | 2        | -0.216        |          |
|                    |                      | <b>3</b> | <b>-0.260</b> | <b>3</b> |
|                    |                      | 4        | -0.099        |          |
|                    | Public health        | 0        | 0.008         |          |
|                    |                      | 1        | -0.267        |          |
|                    |                      | 2        | -0.525        |          |
|                    |                      | <b>3</b> | <b>-0.757</b> | <b>3</b> |
|                    |                      | 4        | -0.732        |          |
| <b>(13) France</b> | Three areas combined | 0        | 1.639         |          |
|                    |                      | 1        | 0.440         |          |
|                    |                      | 2        | 0.171         |          |
|                    |                      | <b>3</b> | <b>-0.144</b> | <b>3</b> |
|                    |                      | 4        | -0.085        |          |

|                         |                      |          |               |          |
|-------------------------|----------------------|----------|---------------|----------|
|                         | Laboratory sciences  | 0        | 0.682         |          |
|                         |                      | 1        | -0.202        |          |
|                         |                      | 2        | -0.372        |          |
|                         |                      | <b>3</b> | <b>-0.837</b> | <b>3</b> |
|                         |                      | 4        | -0.689        |          |
|                         | Clinical research    | 0        | 1.286         |          |
|                         |                      | 1        | 1.048         |          |
|                         |                      | 2        | 0.347         |          |
|                         |                      | <b>3</b> | <b>-0.396</b> | <b>3</b> |
|                         |                      | 4        | -0.228        |          |
|                         | Public health        | 0        | 0.362         |          |
|                         |                      | <b>1</b> | <b>-0.219</b> | <b>1</b> |
|                         |                      | 2        | -0.056        |          |
|                         |                      | 3        | 0.071         |          |
|                         |                      | 4        | 0.277         |          |
| <b>(14) Netherlands</b> | Three areas combined | 0        | 1.615         |          |
|                         |                      | <b>1</b> | <b>0.857</b>  | <b>1</b> |
|                         |                      | 2        | 0.953         |          |
|                         |                      | 3        | 0.927         |          |
|                         |                      | 4        | 1.075         |          |
|                         | Laboratory sciences  | 0        | 0.321         |          |
|                         |                      | <b>1</b> | <b>-0.174</b> | <b>1</b> |
|                         |                      | 2        | -0.022        |          |
|                         |                      | 3        | 0.141         |          |
|                         |                      | 4        | 0.356         |          |
|                         | Clinical research    | 0        | 0.434         |          |
|                         |                      | <b>1</b> | <b>-0.147</b> | <b>1</b> |
|                         |                      | 2        | -0.019        |          |
|                         |                      | 3        | 0.122         |          |
|                         |                      | 4        | 0.258         |          |
|                         | Public health        | 0        | 1.422         |          |
|                         |                      | 1        | 0.781         |          |
|                         |                      | 2        | 0.680         |          |
|                         |                      | <b>3</b> | <b>0.498</b>  | <b>3</b> |
|                         |                      | 4        | 0.645         |          |
| <b>(15) South Korea</b> | Three areas combined | 0        | 1.176         |          |
|                         |                      | <b>1</b> | <b>0.435</b>  | <b>1</b> |
|                         |                      | 2        | 0.539         |          |
|                         |                      | 3        | 0.611         |          |
|                         |                      | 4        | 0.783         |          |
|                         | Laboratory sciences  | 0        | 0.893         |          |
|                         |                      | 1        | -0.478        |          |
|                         |                      | <b>2</b> | <b>-0.505</b> | <b>2</b> |
|                         |                      | 3        | -0.339        |          |
|                         |                      | 4        | -0.399        |          |
|                         | Clinical research    | <b>0</b> | <b>0.225</b>  | <b>0</b> |
|                         |                      | 1        | 0.321         |          |
|                         |                      | 2        | 0.457         |          |
|                         |                      | 3        | 0.696         |          |
|                         |                      | 4        | 0.806         |          |
|                         | Public health        | 0        | 0.772         |          |
|                         |                      | 1        | -0.253        |          |
|                         |                      | 2        | -0.298        |          |
|                         |                      | <b>3</b> | <b>-0.505</b> | <b>3</b> |
|                         |                      | 4        | -0.389        |          |

**Table S2.2. The Bayesian information criterion (BIC) in the joinpoint regression. The model with the smallest BIC was selected for AAPC 2 estimation in each research discipline.**

| Country                     | Research area        | Number of joinpoint(s) | BIC           | Selected joinpoint(s) |
|-----------------------------|----------------------|------------------------|---------------|-----------------------|
| <i>(1) All countries</i>    | Three areas combined | 0                      | 2.976         |                       |
|                             |                      | 1                      | 1.201         |                       |
|                             |                      | <b>2</b>               | <b>0.798</b>  | <b>2</b>              |
|                             |                      | 3                      | 0.832         |                       |
|                             |                      | 4                      | 0.991         |                       |
|                             | Laboratory sciences  | 0                      | 1.486         |                       |
|                             |                      | 1                      | -0.219        |                       |
|                             |                      | 2                      | -0.266        |                       |
|                             |                      | <b>3</b>               | <b>-0.277</b> | <b>3</b>              |
|                             |                      | 4                      | -0.136        |                       |
|                             | Clinical research    | 0                      | 3.189         |                       |
|                             |                      | 1                      | 1.307         |                       |
|                             |                      | 2                      | 1.065         |                       |
|                             |                      | 3                      | 0.941         |                       |
|                             |                      | <b>4</b>               | <b>0.737</b>  | <b>4</b>              |
|                             | Public health        | 0                      | 2.953         |                       |
| 1                           |                      | 1.822                  |               |                       |
| 2                           |                      | 1.332                  |               |                       |
| <b>3</b>                    |                      | <b>1.293</b>           | <b>3</b>      |                       |
| 4                           |                      | 1.457                  |               |                       |
| <i>(2) Top 13 countries</i> | Three areas combined | 0                      | 2.793         |                       |
|                             |                      | 1                      | 1.396         |                       |
|                             |                      | <b>2</b>               | <b>0.811</b>  | <b>2</b>              |
|                             |                      | 3                      | 0.963         |                       |
|                             |                      | 4                      | 1.100         |                       |
|                             | Laboratory sciences  | 0                      | 1.177         |                       |
|                             |                      | 1                      | -0.060        |                       |
|                             |                      | <b>2</b>               | <b>-0.160</b> | <b>2</b>              |
|                             |                      | 3                      | -0.132        |                       |
|                             |                      | 4                      | -0.072        |                       |
|                             | Clinical research    | 0                      | 2.875         |                       |
|                             |                      | 1                      | 1.378         |                       |
|                             |                      | 2                      | 0.916         |                       |
|                             |                      | 3                      | 0.756         |                       |
|                             |                      | <b>4</b>               | <b>0.643</b>  | <b>4</b>              |
|                             | Public health        | 0                      | 3.117         |                       |
| 1                           |                      | 1.877                  |               |                       |
| 2                           |                      | 1.666                  |               |                       |
| <b>3</b>                    |                      | <b>1.616</b>           | <b>3</b>      |                       |
| 4                           |                      | 1.809                  |               |                       |
| <i>(3) United States</i>    | Three areas combined | 0                      | 2.262         |                       |
|                             |                      | <b>1</b>               | <b>0.586</b>  | <b>1</b>              |
|                             |                      | 2                      | 0.689         |                       |
|                             |                      | 3                      | 0.931         |                       |
|                             |                      | 4                      | 1.117         |                       |
|                             | Laboratory sciences  | 0                      | 0.607         |                       |
|                             |                      | <b>1</b>               | <b>0.083</b>  | <b>1</b>              |
|                             |                      | 2                      | 0.237         |                       |
|                             |                      | 3                      | 0.236         |                       |
|                             |                      | 4                      | 0.343         |                       |
|                             | Clinical research    | 0                      | 2.282         |                       |
|                             |                      | 1                      | 0.691         |                       |
|                             |                      | <b>2</b>               | <b>0.671</b>  | <b>2</b>              |
|                             |                      | 3                      | 0.767         |                       |
|                             |                      | 4                      | 0.832         |                       |
|                             | Public health        | 0                      | 2.661         |                       |
| <b>1</b>                    |                      | <b>1.004</b>           | <b>1</b>      |                       |
| 2                           |                      | 1.197                  |               |                       |
| 3                           |                      | 1.289                  |               |                       |
| 4                           |                      | 1.514                  |               |                       |

|                           |                      |              |               |          |
|---------------------------|----------------------|--------------|---------------|----------|
| <b>(4) United Kingdom</b> | Three areas combined | 0            | 1.977         |          |
|                           |                      | 1            | 0.426         |          |
|                           |                      | 2            | 0.368         |          |
|                           |                      | <b>3</b>     | <b>0.210</b>  | <b>3</b> |
|                           |                      | 4            | 0.278         |          |
|                           | Laboratory sciences  | 0            | 1.352         |          |
|                           |                      | <b>1</b>     | <b>0.449</b>  | <b>1</b> |
|                           |                      | 2            | 0.592         |          |
|                           |                      | 3            | 0.551         |          |
|                           |                      | 4            | 0.651         |          |
|                           | Clinical research    | 0            | 1.595         |          |
|                           |                      | <b>1</b>     | <b>0.237</b>  | <b>1</b> |
|                           |                      | 2            | 0.294         |          |
|                           |                      | 3            | 0.343         |          |
|                           |                      | 4            | 0.587         |          |
|                           | Public health        | 0            | 1.169         |          |
| 1                         |                      | 0.932        |               |          |
| 2                         |                      | 0.649        |               |          |
| <b>3</b>                  |                      | <b>0.015</b> | <b>3</b>      |          |
| 4                         |                      | 0.153        |               |          |
| <b>(5) Italy</b>          | Three areas combined | 0            | 1.085         |          |
|                           |                      | <b>1</b>     | <b>-0.328</b> | <b>1</b> |
|                           |                      | 2            | -0.093        |          |
|                           |                      | 3            | 0.046         |          |
|                           |                      | 4            | 0.250         |          |
|                           | Laboratory sciences  | 0            | 0.355         |          |
|                           |                      | 1            | -0.867        |          |
|                           |                      | <b>2</b>     | <b>-0.895</b> | <b>2</b> |
|                           |                      | 3            | -0.846        |          |
|                           |                      | 4            | -0.713        |          |
|                           | Clinical research    | 0            | 1.204         |          |
|                           |                      | <b>1</b>     | <b>0.374</b>  | <b>1</b> |
|                           |                      | 2            | 0.548         |          |
|                           |                      | 3            | 0.573         |          |
|                           |                      | 4            | 0.651         |          |
|                           | Public health        | 0            | 0.991         |          |
| 1                         |                      | 0.256        |               |          |
| 2                         |                      | 0.225        |               |          |
| 3                         |                      | 0.274        |               |          |
| <b>4</b>                  |                      | <b>0.221</b> | <b>4</b>      |          |
| <b>(6) Canada</b>         | Three areas combined | 0            | 1.362         |          |
|                           |                      | 1            | 0.930         |          |
|                           |                      | <b>2</b>     | <b>0.911</b>  | <b>2</b> |
|                           |                      | 3            | 0.931         |          |
|                           |                      | 4            | 1.110         |          |
|                           | Laboratory sciences  | 0            | -0.282        |          |
|                           |                      | <b>1</b>     | <b>-0.684</b> | <b>1</b> |
|                           |                      | 2            | -0.501        |          |
|                           |                      | 3            | -0.302        |          |
|                           |                      | 4            | -0.112        |          |
|                           | Clinical research    | 0            | 1.066         |          |
|                           |                      | 1            | 0.478         |          |
|                           |                      | 2            | 0.541         |          |
|                           |                      | <b>3</b>     | <b>0.231</b>  | <b>3</b> |
|                           |                      | 4            | 0.259         |          |
|                           | Public health        | 0            | 1.204         |          |
| 1                         |                      | 1.039        |               |          |
| 2                         |                      | 0.799        |               |          |
| 3                         |                      | 0.665        |               |          |
| <b>4</b>                  |                      | <b>0.649</b> | <b>4</b>      |          |
| <b>(7) South Africa</b>   | Three areas combined | 0            | 0.303         |          |
|                           |                      | <b>1</b>     | <b>-0.490</b> | <b>1</b> |
|                           |                      | 2            | -0.275        |          |

|             |                     |                      |               |               |          |
|-------------|---------------------|----------------------|---------------|---------------|----------|
|             |                     | 3                    | -0.088        |               |          |
|             |                     | 4                    | 0.171         |               |          |
|             | Laboratory sciences | 0                    | 0.125         |               |          |
|             |                     | 1                    | -0.252        |               |          |
|             |                     | <b>2</b>             | <b>-0.301</b> | <b>2</b>      |          |
|             |                     | 3                    | -0.145        |               |          |
|             |                     | 4                    | -0.016        |               |          |
|             | Clinical research   | 0                    | 0.222         |               |          |
|             |                     | 1                    | -0.665        |               |          |
|             |                     | <b>2</b>             | <b>-0.677</b> | <b>2</b>      |          |
|             |                     | 3                    | -0.553        |               |          |
|             |                     | 4                    | -0.326        |               |          |
|             | Public health       | 0                    | -0.010        |               |          |
|             |                     | <b>1</b>             | <b>-0.469</b> | <b>1</b>      |          |
|             |                     | 2                    | -0.339        |               |          |
|             |                     | 3                    | -0.147        |               |          |
|             |                     | 4                    | 0.081         |               |          |
| <b>(8)</b>  | <b>Spain</b>        | Three areas combined | 0             | 1.913         |          |
|             |                     |                      | 1             | 1.112         |          |
|             |                     |                      | 2             | 0.843         |          |
|             |                     |                      | 3             | 0.673         |          |
|             |                     |                      | <b>4</b>      | <b>0.445</b>  | <b>4</b> |
|             | Laboratory sciences | 0                    | 0.478         |               |          |
|             |                     | 1                    | 0.351         |               |          |
|             |                     | 2                    | 0.193         |               |          |
|             |                     | 3                    | 0.122         |               |          |
|             |                     | <b>4</b>             | <b>-0.007</b> | <b>4</b>      |          |
|             | Clinical research   | 0                    | 0.851         |               |          |
|             |                     | <b>1</b>             | <b>0.529</b>  | <b>1</b>      |          |
|             |                     | 2                    | 0.568         |               |          |
|             |                     | 3                    | 0.676         |               |          |
|             |                     | 4                    | 0.707         |               |          |
|             | Public health       | 0                    | 0.846         |               |          |
|             |                     | 1                    | -0.252        |               |          |
|             |                     | 2                    | -0.283        |               |          |
|             |                     | 3                    | -0.325        |               |          |
|             |                     | <b>4</b>             | <b>-0.513</b> | <b>4</b>      |          |
| <b>(9)</b>  | <b>China</b>        | Three areas combined | 0             | -0.210        |          |
|             |                     |                      | 1             | -0.821        |          |
|             |                     |                      | <b>2</b>      | <b>-0.842</b> | <b>2</b> |
|             |                     |                      | 3             | -0.681        |          |
|             |                     |                      | 4             | -0.654        |          |
|             | Laboratory sciences | 0                    | -0.098        |               |          |
|             |                     | <b>1</b>             | <b>-0.287</b> | <b>1</b>      |          |
|             |                     | 2                    | -0.280        |               |          |
|             |                     | 3                    | -0.097        |               |          |
|             |                     | 4                    | -0.077        |               |          |
|             | Clinical research   | <b>0</b>             | <b>-0.080</b> | <b>0</b>      |          |
|             |                     | 1                    | 0.117         |               |          |
|             |                     | 2                    | 0.038         |               |          |
|             |                     | 3                    | 0.236         |               |          |
|             |                     | 4                    | 0.486         |               |          |
|             | Public health       | <b>0</b>             | <b>-1.100</b> | <b>0</b>      |          |
|             |                     | 1                    | -1.013        |               |          |
|             |                     | 2                    | -0.950        |               |          |
|             |                     | 3                    | -0.721        |               |          |
|             |                     | 4                    | -0.578        |               |          |
| <b>(10)</b> | <b>Germany</b>      | Three areas combined | 0             | 2.044         |          |
|             |                     |                      | <b>1</b>      | <b>0.710</b>  | <b>1</b> |
|             |                     |                      | 2             | 0.855         |          |
|             |                     |                      | 3             | 0.929         |          |
|             |                     |                      | 4             | 1.047         |          |
|             | Laboratory sciences | 0                    | 0.978         |               |          |



|                    |                      |          |               |          |
|--------------------|----------------------|----------|---------------|----------|
|                    |                      | 1        | 0.724         |          |
|                    |                      | 2        | 0.761         |          |
|                    |                      | <b>3</b> | <b>0.481</b>  | <b>3</b> |
|                    |                      | 4        | 0.734         |          |
|                    | Clinical research    | 0        | 1.366         |          |
|                    |                      | <b>1</b> | <b>0.084</b>  | <b>1</b> |
|                    |                      | 2        | 0.212         |          |
|                    |                      | 3        | 0.440         |          |
|                    |                      | 4        | 0.573         |          |
|                    | Public health        | 0        | 0.492         |          |
|                    |                      | 1        | 0.139         |          |
|                    |                      | <b>2</b> | <b>0.112</b>  | <b>2</b> |
|                    |                      | 3        | 0.326         |          |
|                    |                      | 4        | 0.444         |          |
| <b>(11) India</b>  | Three areas combined | <b>0</b> | <b>-0.298</b> | <b>0</b> |
|                    |                      | 1        | -0.290        |          |
|                    |                      | 2        | -0.229        |          |
|                    |                      | 3        | -0.159        |          |
|                    |                      | 4        | -0.240        |          |
|                    | Laboratory sciences  | <b>0</b> | <b>-0.522</b> | <b>0</b> |
|                    |                      | 1        | -0.366        |          |
|                    |                      | 2        | -0.173        |          |
|                    |                      | 3        | -0.256        |          |
|                    |                      | 4        | -0.056        |          |
|                    | Clinical research    | 0        | 0.727         |          |
|                    |                      | 1        | 0.706         |          |
|                    |                      | 2        | 0.753         |          |
|                    |                      | 3        | 0.556         |          |
|                    |                      | <b>4</b> | <b>0.321</b>  | <b>4</b> |
|                    | Public health        | 0        | 0.180         |          |
|                    |                      | 1        | -0.048        |          |
|                    |                      | 2        | -0.226        |          |
|                    |                      | <b>3</b> | <b>-0.532</b> | <b>3</b> |
|                    |                      | 4        | -0.324        |          |
| <b>(12) Brazil</b> | Three areas combined | 0        | 0.770         |          |
|                    |                      | <b>1</b> | <b>0.303</b>  | <b>1</b> |
|                    |                      | 2        | 0.524         |          |
|                    |                      | 3        | 0.524         |          |
|                    |                      | 4        | 0.778         |          |
|                    | Laboratory sciences  | 0        | 0.639         |          |
|                    |                      | 1        | 0.318         |          |
|                    |                      | 2        | 0.114         |          |
|                    |                      | <b>3</b> | <b>-0.385</b> | <b>3</b> |
|                    |                      | 4        | -0.202        |          |
|                    | Clinical research    | 0        | -0.245        |          |
|                    |                      | <b>1</b> | <b>-0.778</b> | <b>1</b> |
|                    |                      | 2        | -0.682        |          |
|                    |                      | 3        | -0.481        |          |
|                    |                      | 4        | -0.296        |          |
|                    | Public health        | 0        | -0.269        |          |
|                    |                      | 1        | -0.171        |          |
|                    |                      | 2        | -0.378        |          |
|                    |                      | <b>3</b> | <b>-0.623</b> | <b>3</b> |
|                    |                      | 4        | -0.489        |          |
| <b>(13) France</b> | Three areas combined | 0        | 1.428         |          |
|                    |                      | 1        | 0.360         |          |
|                    |                      | 2        | -0.031        |          |
|                    |                      | 3        | -0.445        |          |
|                    |                      | <b>4</b> | <b>-0.465</b> | <b>4</b> |
|                    | Laboratory sciences  | 0        | 0.355         |          |
|                    |                      | 1        | -0.430        |          |
|                    |                      | 2        | -0.554        |          |
|                    |                      | <b>3</b> | <b>-0.896</b> | <b>3</b> |

|                         |                      |          |               |          |
|-------------------------|----------------------|----------|---------------|----------|
|                         |                      | 4        | -0.640        |          |
|                         | Clinical research    | 0        | 1.762         |          |
|                         |                      | 1        | 1.537         |          |
|                         |                      | 2        | 0.738         |          |
|                         |                      | <b>3</b> | <b>0.067</b>  | <b>3</b> |
|                         |                      | 4        | 0.171         |          |
|                         | Public health        | 0        | 0.285         |          |
|                         |                      | <b>1</b> | <b>-0.086</b> | <b>1</b> |
|                         |                      | 2        | 0.077         |          |
|                         |                      | 3        | 0.306         |          |
|                         |                      | 4        | 0.450         |          |
| <b>(14) Netherlands</b> | Three areas combined | 0        | 1.447         |          |
|                         |                      | 1        | 0.925         |          |
|                         |                      | 2        | 1.073         |          |
|                         |                      | <b>3</b> | <b>0.675</b>  | <b>3</b> |
|                         |                      | 4        | 0.785         |          |
|                         | Laboratory sciences  | 0        | 0.225         |          |
|                         |                      | <b>1</b> | <b>-0.273</b> | <b>1</b> |
|                         |                      | 2        | -0.172        |          |
|                         |                      | 3        | -0.175        |          |
|                         |                      | 4        | -0.015        |          |
|                         | Clinical research    | 0        | 0.884         |          |
|                         |                      | 1        | 0.309         |          |
|                         |                      | 2        | 0.343         |          |
|                         |                      | <b>3</b> | <b>0.266</b>  | <b>3</b> |
|                         |                      | 4        | 0.438         |          |
|                         | Public health        | 0        | 0.998         |          |
|                         |                      | 1        | 0.710         |          |
|                         |                      | 2        | 0.754         |          |
|                         |                      | <b>3</b> | <b>0.502</b>  | <b>3</b> |
|                         |                      | 4        | 0.739         |          |
| <b>(15) South Korea</b> | Three areas combined | 0        | 1.252         |          |
|                         |                      | <b>1</b> | <b>0.443</b>  | <b>1</b> |
|                         |                      | 2        | 0.449         |          |
|                         |                      | 3        | 0.505         |          |
|                         |                      | 4        | 0.594         |          |
|                         | Laboratory sciences  | 0        | 0.558         |          |
|                         |                      | <b>1</b> | <b>-1.120</b> | <b>1</b> |
|                         |                      | 2        | -0.959        |          |
|                         |                      | 3        | -0.972        |          |
|                         |                      | 4        | -0.884        |          |
|                         | Clinical research    | <b>0</b> | <b>0.339</b>  | <b>0</b> |
|                         |                      | 1        | 0.445         |          |
|                         |                      | 2        | 0.386         |          |
|                         |                      | 3        | 0.577         |          |
|                         |                      | 4        | 0.785         |          |
|                         | Public health        | 0        | 0.477         |          |
|                         |                      | 1        | -0.710        |          |
|                         |                      | <b>2</b> | <b>-0.715</b> | <b>2</b> |
|                         |                      | 3        | -0.483        |          |
|                         |                      | 4        | -0.415        |          |
